# Supplementary material for: A mode-localized MEMS electrical potential sensor based on three electrically coupled resonators
Source: Copernicus journal article supplement (doi:10.5194/jsss-6-1-2017), 2017-01-09
Supplement: Supplementary file 1 [file Data.xlsx]

## Sheet: 30V Port 1
	V1	X1 (mV)	X3 (mV)	Out-of-phase Frequency			Amplitude ratio		Frequency shift
	-90.87	1679.6	62.467	14940.5			26.8878		0.000675802
	-83.32	1680	68.144	14939.1			24.6537		0.000582034
	-75.77	1680.8	74.048	14938			22.6988		0.000508358
	-68.22	1681.5	81.702	14936.8			20.5809		0.000427986
	-60.68	1682.7	89.231	14935.8			18.8578		0.000361008
	-53.12	1683.6	98.53	14934.9			17.0872		0.000300729
	-45.57	1684.3	108.03	14934			15.591		0.000240449
	-38.02	1685.8	119.79	14933.1			14.073		0.000180169
	-30.47	1686.9	130.3	14932.5			12.9463		0.000139983
	-22.92	1687.4	143.04	14931.9			11.7967		9.97963e-05
	-15.37	1681	153.18	14931.6			10.974		7.97031e-05
	-13.86	1690.1	154.57	14931.2			10.9342		5.6261e-05
	-12.35	1690.4	157.6	14931.2			10.7259		5.09028e-05
	-10.84	1688.9	159.26	14931.1			10.6047		4.82237e-05
	-9.33	1693.4	163.77	14931.1			10.3401		4.42051e-05
	-7.82	1692.2	165.44	14931			10.2285		3.68376e-05
	-6.31	1693	168.19	14930.9			10.066		3.08096e-05
	-4.79	1694.6	172.34	14930.8			9.83289		2.54514e-05
	-3.28	1694	174.59	14930.7			9.70273		1.94234e-05
	-1.74	1696	176.17	14930.6			9.62706		1.33955e-05
Bias point	0	1671.1	175.84	14930.4			9.50353		0
	1.3	1696.6	181.7	14930.2			9.33737		-1.40653e-05
	2.81	1695.7	184.9	14930.1			9.1709		-1.87537e-05

## Sheet: 30V Port 2
	V1	X1 (mV)	X3 (mV)	In-phase Frequency			Amplitude ratio		Frequency shift
	4.2	1690.3	183.82	14925.6			9.19541		1.139e-05
Bias point	4.15	1671.1	175.84	14925.4			9.50353		0
	4.1	1667.6	165.2	14925.2			10.0944		-1.541e-05
	4.05	1670.2	159.97	14924.9			10.4407		-3.41699e-05
	4	1667.8	152.07	14924.6			10.9673		-5.22598e-05
	3.95	1669.4	147.65	14924.4			11.3065		-6.69998e-05
	3.9	1669.2	142.48	14924.2			11.7153		-8.10697e-05
	3.85	1668.5	137.55	14923.9			12.1301		-0.00010452
	3.8	1668.2	132.69	14923.5			12.5722		-0.00012596
	3.75	1668.6	129.6	14923.4			12.875		-0.00013735
	3.7	1663.1	123.48	14923.1			13.4686		-0.00015276
	3.65	1666.8	120.66	14922.8			13.814		-0.000173529
	3.6	1664.2	116.57	14922.5			14.2764		-0.000192289
	3.4	1663	102.91	14921.6			16.1598		-0.000255269
	3.2	1662.1	91.873	14920.6			18.0913		-0.000320929
	3	1659.6	82.288	14919.6			20.1682		-0.000393289
	2.8	1657.1	75.585	14918.5			21.9237		-0.000465649
	2.6	1656.2	69.015	14917.5			23.9977		-0.000532648
	2.4	1654.7	63.527	14916.4			26.0472		-0.000605678
	2.2	1656.5	59.059	14915.3			28.0482		-0.000680048
	2	1654.1	54.524	14914.2			30.3371		-0.000749728
	1.8	1654	51.004	14913.1			32.4288		-0.000822757
	1.6	1652.6	47.868	14912			34.5241		-0.000901817
	1.4	1650.2	45.431	14910.9			36.3232		-0.000975517
	1.2	1650.6	42.599	14909.9			38.7474		-0.00104252
	1	1649.4	40.664	14908.7			40.5617		-0.00112024
	0.5	1647.3	35.991	14906			45.7698		-0.00130382
	0	1645.8	32.212	14902.9			51.0928		-0.00150616

## Sheet: 35V Port 1
	V1	X1 (mV)	X3 (mV)				Amplitude ratio
	-90.87	1754.6	78.151				22.4514
	-83.32	1755.5	84.269				20.8321
	-75.77	1755.6	90.133				19.4779
	-68.22	1756.4	97.114				18.086
	-60.68	1756.3	104.16				16.8616
	-53.12	1756.6	111.92				15.6951
	-45.57	1756.5	120.67				14.5562
	-38.02	1756.9	129.34				13.5836
	-30.47	1756.1	137.26				12.794
	-22.92	1756.9	147.39				11.9201
	-15.37	1757.5	155.25				11.3205
	-13.86	1757.3	156.77				11.2094
	-12.35	1756.8	158.64				11.0741
	-10.84	1755.3	160.41				10.9426
	-9.33	1754.6	161.9				10.8376
	-7.82	1754.9	163.3				10.7465
	-6.31	1754.7	164.59				10.661
	-4.79	1752.1	166.19				10.5428
	-3.28	1752	167.5				10.4597
	-1.74	1739.1	168.78				10.3039
Bias point	0	1729.2	166.82				10.3657
	1.3	1748.4	172.11				10.1586
	2.81	1755.3	174.85				10.0389
	4.32	1755.3	176.33				9.95463
	5.83	1754	177.44				9.88503
	7.34	1755.4	179.85				9.76036
	8.85	1756.5	180.3				9.7421
	10.36	1756	181.76				9.66109
	11.86	1754	182.62				9.60464
	13.38	1755.2	184.92				9.49167
	14.89	1756.5	187.68				9.35902

## Sheet: 35V Port 2
	V1	X1 (mV)	X3 (mV)				Amplitude ratio
	2.2	1732.4	293.31				5.90638
	2.1	1734.1	260.48				6.65732
	2	1733.6	235.95				7.34732
	1.9	1732.8	215.15				8.05392
	1.8	1730.4	195.49				8.8516
	1.7	1729.9	181.35				9.53901
Bias point	1.6	1729.2	166.82				10.3657
	1.5	1727.9	155.57				11.1069
	1.4	1727.5	144.31				11.9708
	1.3	1727	135.09				12.7841
	1.2	1726.5	127.5				13.5412
	1.1	1726.1	119.63				14.4287
	1	1725.3	112.71				15.3074
	0.75	1724.7	99.3				17.3686
	0.5	1723.6	88.56				19.4625
	0.25	1722.5	79.823				21.579
	0	1721.6	72.113				23.8736
	-0.25	1720.7	66.684				25.8038
	-0.5	1719.6	61.381				28.0152
	-0.75	1719.5	57.855				29.7209
	-1	1720.4	53.614				32.0886
	-1.5	1719.9	46.995				36.5975
	-2	1718.3	41.687				41.2191
	-2.5	1718.2	38.035				45.1742
	-3	1717.6	34.217				50.1973

## Sheet: 40V Port 1
	V1	X1 (mV)	X3 (mV)				Amplitude ratio
	-90.87	1808.7	97.276	18.5935			18.5935
	-83.32	1809.2	103.03	17.5599			17.5599
	-75.77	1808.9	108.49	16.6734			16.6734
	-68.22	1809.2	114.36	15.8202			15.8202
	-60.68	1808.3	120.62	14.9917			14.9917
	-53.12	1806.6	126.31	14.3029			14.3029
	-45.57	1805.8	130.97	13.7879			13.7879
	-38.02	1804.8	137.48	13.1277			13.1277
	-30.47	1804.5	143.1	12.6101			12.6101
	-22.92	1804.3	148.9	12.1175			12.1175
	-15.37	1802.7	152.79	11.7985			11.7985
	-13.86	1800.5	153.48	11.7312			11.7312
	-12.35	1800	155.23	11.5957			11.5957
	-10.84	1798.9	156.97	11.4602			11.4602
	-9.33	1796	158.29	11.3463			11.3463
	-7.82	1790.9	159.83	11.205			11.205
	-6.31	1785.8	159.75	11.1787			11.1787
	-4.79	1786.8	160.65	11.1223			11.1223
	-3.28	1786.3	161.91	11.0327			11.0327
	-1.74	1782.7	162.09	10.9982			10.9982
Bias point	0	1791.7	164.6	10.8852			10.8852
	1.3	1790.3	164.15	10.9065			10.9065
	2.81	1793.2	165.28	10.8495			10.8495
	4.32	1801.2	166.53	10.8161			10.8161
	5.83	1802.8	167.22	10.781			10.781
	7.34	1799.8	167.54	10.7425			10.7425
	8.85	1804.6	168.85	10.6876			10.6876
	10.36	1806.9	170.91	10.5722			10.5722
	11.86	1808.7	172.02	10.5145			10.5145
	13.38	1808.9	172.86	10.4645			10.4645
	14.89	1807.6	173.23	10.4347			10.4347

## Sheet: 40V Port 2
	V1	X1 (mV)	X3 (mV)				Amplitude ratio
	0.3	1749.5	471.98				3.70672
	0.2	1762.7	417.34				4.22365
	0.1	1769.6	370.93				4.77071
	0	1772.5	338.18				5.24129
	-0.1	1759	305.71				5.75382
	-0.2	1784.9	284.02				6.28442
	-0.25	1787.4	272.94				6.54869
	-0.3	1787.2	260.52				6.86013
	-0.35	1787.7	252.08				7.0918
	-0.4	1787.4	240.81				7.42245
	-0.45	1789.2	232.54				7.69416
	-0.5	1788.5	222.99				8.02054
	-0.6	1789.4	209.81				8.52867
	-0.7	1791.3	195.98				9.14022
	-0.8	1790.2	183.66				9.74736
	-0.9	1790.3	173.44				10.3223
Bias point	-1	1791.7	164.6				10.8852
	-1.1	1791.6	155.56				11.5171
	-1.2	1790.9	147.66				12.1285
	-1.3	1789	139.88				12.7895
	-1.4	1790.7	134.55				13.3088
	-1.5	1790.9	128.75				13.9099
	-1.6	1789.5	122.82				14.5701
	-1.7	1790.8	118.67				15.0906
	-1.8	1789.4	114.19				15.6704
	-1.9	1790.6	109.69				16.3242
	-2	1790.5	105.79				16.925
	-2.5	1768	88.422				19.995
	-3	1766.1	75.81				23.2964
	-3.5	1766.4	66.731				26.4705
	-4	1764.5	59.717				29.5477
	-4.5	1764.9	53.301				33.1119
	-5	1764.9	48.183				36.6291
	-5.5	1766.4	44.372				39.8089
	-6	1764.8	40.891				43.1586
	-6.5	1764.7	37.745				46.7532
	-7	1763.9	35.286				49.9887

## Sheet: Frequency Response
Frequency	X1 (V)	X3 (V)
14924	0.34786	0.1148
14924.5	0.3757	0.16054
14925	0.40014	0.21771
14925.2	0.40684	0.23061
14925.4	0.41284	0.23019
14925.6	0.42205	0.21971
14925.8	0.43471	0.20563
14926	0.44876	0.1913
14926.2	0.46902	0.17758
14926.4	0.48975	0.16656
14926.6	0.51204	0.15826
14926.8	0.53637	0.15131
14927	0.56266	0.14574
14927.2	0.59155	0.14328
14927.4	0.62793	0.13892
14927.6	0.66552	0.13716
14927.8	0.70618	0.13627
14928	0.7534	0.13654
14928.2	0.80849	0.13763
14928.4	0.87424	0.14007
14928.6	0.94484	0.14253
14928.8	1.024	0.1462
14929	1.1087	0.15066
14929.2	1.2105	0.15637
14929.4	1.3666	0.16539
14929.6	1.4526	0.17076
14929.8	1.5823	0.17812
14930	1.6749	0.18216
14930.2	1.7299	0.18168
14930.4	1.7366	0.17507
14930.6	1.6947	0.16561
14930.8	1.6205	0.15462
14931	1.5224	0.14071
14931.2	1.4227	0.1284
14931.4	1.3161	0.11674
14931.6	1.2139	0.10551
14931.8	1.1225	0.09587
14932	1.0389	0.08845
14933	0.72417	0.06013
14934	0.55146	0.04493
