# Supplementary material for: A mode-localized MEMS electrical potential sensor based on three electrically coupled resonators
Source: Copernicus journal article supplement (doi:10.5194/jsss-6-1-2017), 2017-01-09
Supplement: Supplementary file [file jsss-6-1-2017-supplement-title-page.pdf › jsss-6-1-2017-supplement-title-page.pdf]

Supplement of J. Sens. Sens. Syst., 6, 1–8, 2017  
<http://www.j-sens-sens-syst.net/6/1/2017/>  
doi:10.5194/jsss-6-1-2017-supplement  
© Author(s) 2017. CC Attribution 3.0 License.

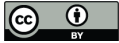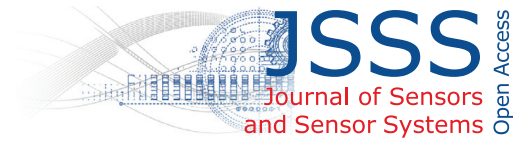

*Supplement of*

## **A mode-localized MEMS electrical potential sensor based on three electrically coupled resonators**

**Chun Zhao et al.**

*Correspondence to:* Michael Kraft (m.kraft@ulg.ac.be)

- [jsss-6-1-2017-supplement-title-page.pdf](#)
- [Data.xlsx](#)

The copyright of individual parts of the supplement might differ from the CC-BY 3.0 licence.
